# Supplementary material for: Synthesis and properties of a novel bridged nucleic acid with a P3′ → N5′ phosphoramidate linkage, 5′-amino-2′,4′-BNA
Source: Royal Society of Chemistry journal article supplement (doi:10.1039/b307290h), 2003-01-01

Supplementary information for;

## Synthesis and properties of a novel bridged nucleic acid with a P3'®N5' phosphoramidate linkage, 5'-amino-2',4'-BNA

Satoshi Obika, Osamu Nakagawa, Akiko Hiroto, Yoshiyuki Hari and Takeshi Imanishi\*

Graduate School of Pharmaceutical Sciences, Osaka University, 1-6 Yamadaoka, Suita, Osaka 565-0871, Japan. Fax: +81 6 6879 8204; Tel: +81 6 6879 8200; E-mail: imanishi@phs.osaka-u.ac.jp

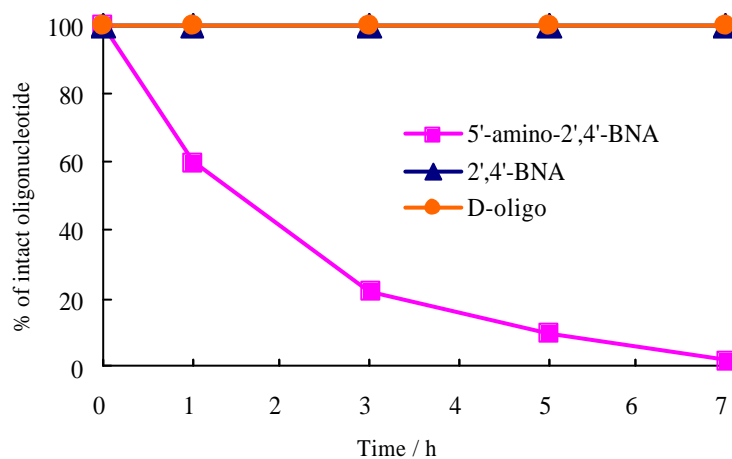

**Fig. S1** Acid-mediated cleavage of modified or natural oligonucleotides. The oligonucleotide (2 nmol) was treated under mild acidic conditions (0.05% TFA in H<sub>2</sub>O, 100 μl) at 25°C. The digested product was analysed by reversed-phase HPLC.

Sequences: 5'-TTTTTTTTTXX-3'

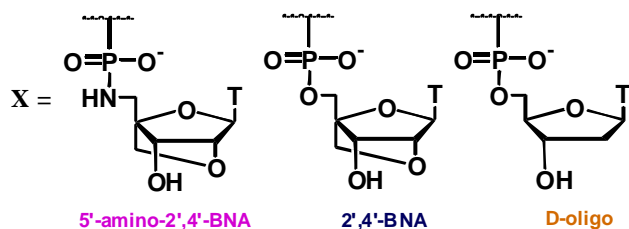

Supplement: b307290h.pdf [file b307290h.pdf]
